# Supplementary material for: Social relationship satisfaction and accumulation of chronic conditions and multimorbidity: a national cohort of Australian women
Source: HighWire-hosted journal article supplement (doi:10.1136/gpsych-2022-100925), 2023-02-01
Supplement: gpsych-2022-100925supp001_data_supplement.pdf [file gpsych-2022-100925supp001_data_supplement.pdf]

SUPPLEMENTARY MATERIALS

Figure S1. Longitudinal transitions of women in different satisfaction categories of each social relationship component. .... 2

Figure S2. ORs and 95% CI (age-period adjusted) for associations between overall social relationships satisfaction score and incidence of each . 3

Table S1. Definitions of covariates..... 4

Table S2. Comparison of characteristics of women who were excluded in the analyses versus included women, ALSWH, 1996 (n=13714)..... 7

Table S3. Percentage of women reporting multimorbidity in Surveys 2-8 by social relationship score at the previous surveys (n=7694) ..... 9

Table S4. Full results of associations (ORs and 95% CIs) between all variables and accumulation of multimorbidity (n=7694)..... 10

Table S5. Roles of each social relationship component (column) in attenuating the associations between other social relationship component (row) and accumulation of multimorbidity (n=7694). ..... 12

Table S6. Associations (ORs and 95% CIs) of overall social relationships satisfaction score at baseline with accumulation of multimorbidity (n=7357)..... 13

Table S7. Associations (ORs and 95% CIs) of overall social relationships satisfaction score with accumulation of multimorbidity in complete cases (n=4521). ..... 14

Table S8. Associations (ORs and 95% CIs) of overall social relationships satisfaction score with incidence of one condition and accumulation of multimorbidity (n=7357). ..... 15

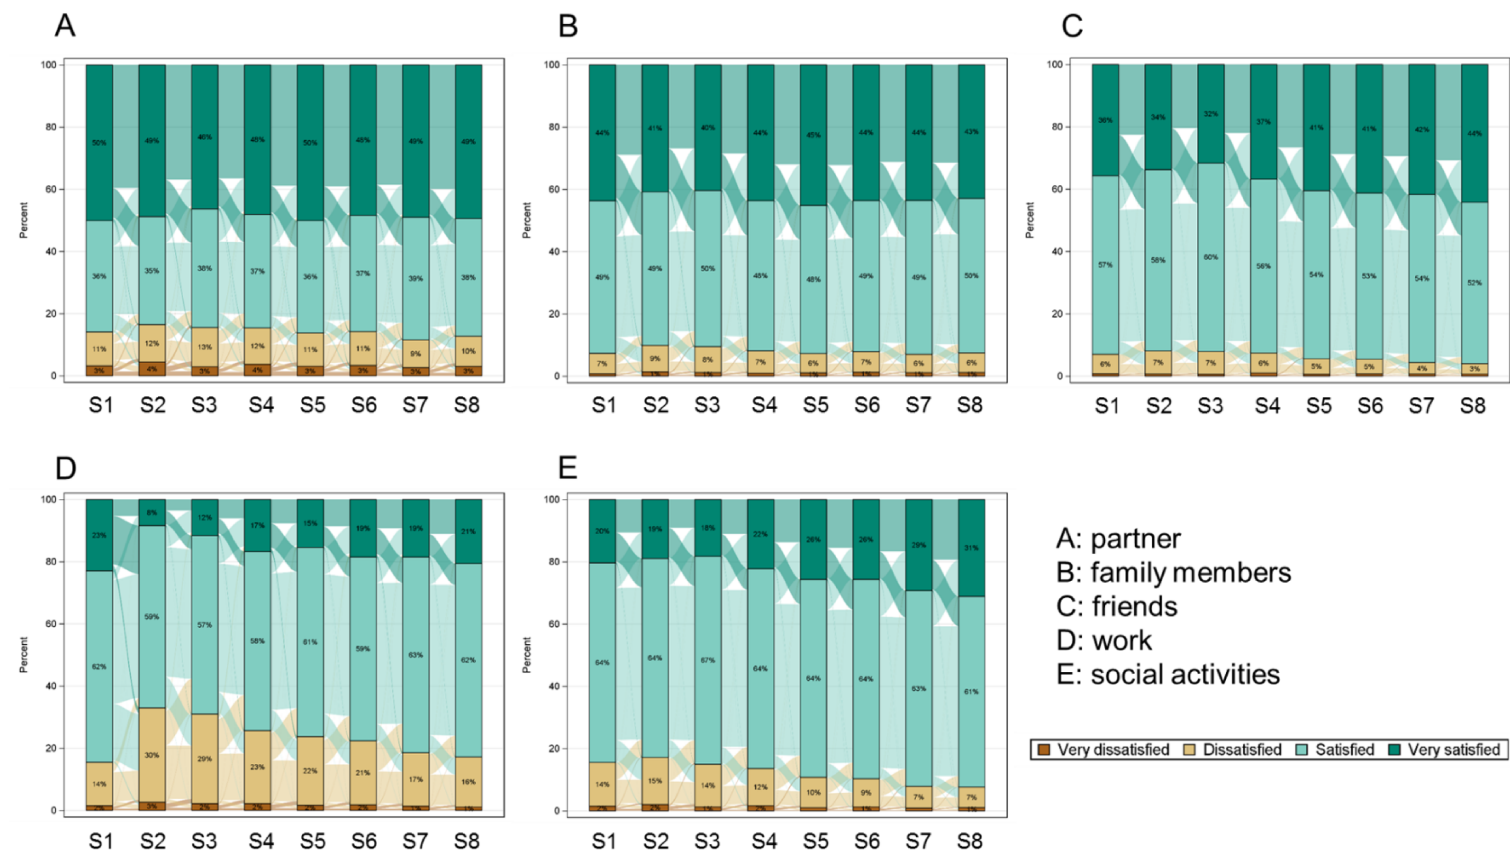

Figure S1. Longitudinal transitions of women in different satisfaction categories of each social relationship component.

The bars with different colours show the distribution of different satisfaction categories at each survey, and the links between bars show the flow from one category to another.

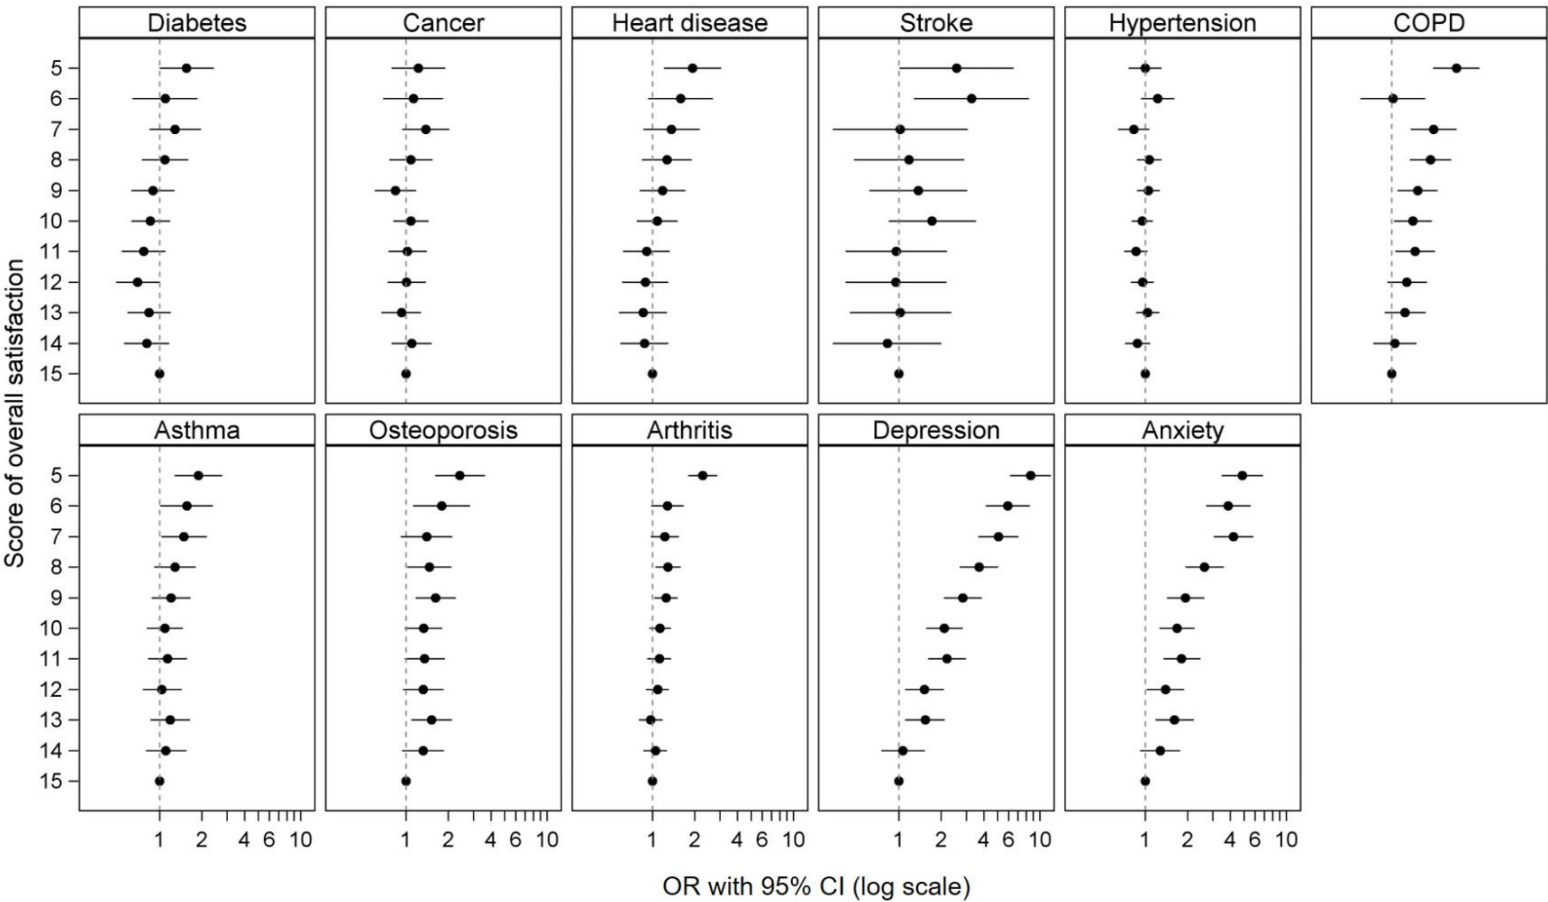

Figure S2. ORs and 95% CI (age-period adjusted) for associations between overall social relationships satisfaction score and incidence of each chronic condition (n=7694).

Table S1. Definitions of covariates.

| Covariate                   | Definition                                                                                       | Source      |
|-----------------------------|--------------------------------------------------------------------------------------------------|-------------|
| Sociodemographic Factors    |                                                                                                  |             |
| Country of birth            |                                                                                                  | Baseline    |
| Australia                   |                                                                                                  |             |
| Other                       | Including United Kingdom, Italy, Greece, New Zealand, Vietnam, and others                        |             |
| Marital status              |                                                                                                  | Each survey |
| Married/de facto            | de facto (opposite sex, same sex)                                                                |             |
| Separated/divorced/widowed  |                                                                                                  |             |
| Never married               | Single                                                                                           |             |
| Area of residence           | Using ARIA+ score to define area of residence *                                                  | Each survey |
| Major cities                | 0-0.20                                                                                           |             |
| Inner regions               | >0.20-2.40                                                                                       |             |
| Outer regions               | >2.40-5.92                                                                                       |             |
| Remote/Very remote          | Remote Australia >5.92-10.53                                                                     |             |
|                             | Very remote Australia>10.53                                                                      |             |
| Education                   |                                                                                                  | Baseline    |
| University/higher degree    | University degree, Higher university degree (e.g. Grad Dip, Masters, PhD)                        |             |
| Trade/apprenticeship/higher | Trade/apprenticeship (e.g. Hairdresser, Chef), Certificate/diploma (e.g. Child Care, Technician) |             |
| Higher school certificate   | Higher school or leaving certificate (or equivalent)                                             |             |
| No or low qualifications    | No formal qualifications, School or intermediate certificate (or equivalent)                     |             |
| Ability to manage on income |                                                                                                  | Each survey |

Easy/not bad

Sometimes difficult

Impossible/difficult always

| Lifestyle Factors           |                                                                                                                |             |
|-----------------------------|----------------------------------------------------------------------------------------------------------------|-------------|
| BMI                         | WHO classification                                                                                             | Each survey |
| Underweight                 | <18.5 kg/m <sup>2</sup>                                                                                        |             |
| Normal weight               | 18.5-24.9 kg/m <sup>2</sup>                                                                                    |             |
| Overweight                  | 25-29.9 kg/m <sup>2</sup>                                                                                      |             |
| Obese                       | ≥ 30 kg/m <sup>2</sup>                                                                                         |             |
| Physical activity           | Using MET min/week to define physical activity †                                                               | Each survey |
| High                        | ≥ 1200 MET min/week                                                                                            |             |
| Moderate                    | 600-1199 MET min/week                                                                                          |             |
| Low                         | 40-599 MET min/week                                                                                            |             |
| Nil/sedentary               | 0-39 MET min/week                                                                                              |             |
| Alcohol intake              | Australian National Health and Medical Research Council guidelines                                             | Each survey |
| Low risk drinker            | up to 14 drinks per week                                                                                       |             |
| Non-drinker/ Rarely drinker |                                                                                                                |             |
| Risky drinker               | more than 15 drinks per week                                                                                   |             |
| Smoking status              |                                                                                                                | Each survey |
| Never-smoker                | Have never smoked                                                                                              |             |
| Ex-smoker                   | Used to smoke                                                                                                  |             |
| Current smoker              | Smoke occasionally or regularly                                                                                |             |
| Menopausal status           | Based on the responses to survey questions about hysterectomy, oophorectomy, hormone use and menstrual pattern | Each survey |

Surgical menopause                    hysterectomy, oophorectomy or both

Hormone use

Pre-menopausal

Peri-menopausal

Post-menopausal

---

\* ARIA+ (Accessibility/Remoteness Index of Australia) is Australia's most authoritative geographic measure of remoteness based on distances to major population centres (1).

† A physical activity score in metabolic equivalent (MET) minutes per week was derived using the following formula: MET min/week = (walking minutes \* 3.5 METs) + (moderate acativity minutes \* 4.0 METs) + (vigorous activity minutes \* 7.5 METs) (2)

Table S2. Comparison of characteristics of women who were excluded in the analyses versus included women, ALSWH, 1996 (n=13714).

| Characteristic                               | Included (7694) | Excluded (6020) | p-value * |
|----------------------------------------------|-----------------|-----------------|-----------|
| <b>Overall satisfaction scores</b>           | 10.9 ± 2.5      | 10.3 ± 2.8      | <0.001    |
| <b>Age at baseline</b>                       | 47.6 ± 1.5      | 47.6 ± 1.5      | 0.211     |
| <b>Area of residence</b>                     |                 |                 | 0.159     |
| Major cities                                 | 2802 (36.4)     | 2197 (36.5)     |           |
| Inner regions                                | 2978 (38.7)     | 2236 (37.2)     |           |
| Outer regions                                | 1535 (20.0)     | 1263 (21.0)     |           |
| Remote/very remote                           | 378 (4.9)       | 322 (5.4)       |           |
| <b>Marital status</b>                        |                 |                 | < 0.001   |
| Married                                      | 6563 (85.6)     | 4748 (79.4)     |           |
| Separated/divorced/widowed                   | 894 (11.7)      | 996 (16.7)      |           |
| Single                                       | 211 (2.8)       | 234 (3.9)       |           |
| <b>Education</b>                             |                 |                 | < 0.001   |
| University/Higher degree                     | 1098 (14.4)     | 794 (13.4)      |           |
| Trade/apprenticeship/diploma                 | 1550 (20.3)     | 1049 (17.7)     |           |
| High school certificate                      | 1292 (16.9)     | 994 (16.7)      |           |
| No qualifications                            | 3695 (48.4)     | 3104 (52.3)     |           |
| <b>Country of birth</b>                      |                 |                 | 0.797     |
| Australia                                    | 5800 (76.2)     | 4505 (76.0)     |           |
| Outside Australia                            | 1813 (23.8)     | 1423 (24.0)     |           |
| <b>Ability to manage on income</b>           |                 |                 | <0.001    |
| Easy/not bad                                 | 4639 (60.5)     | 3038 (51.0)     |           |
| Sometime difficult                           | 2079 (27.1)     | 1842 (30.9)     |           |
| Impossible/difficult always                  | 949 (12.4)      | 1081 (18.1)     |           |
| <b>BMI categories</b>                        |                 |                 | <0.001    |
| Underweight (< 18.5 kg/m <sup>2</sup> )      | 119 (1.6)       | 116 (2.0)       |           |
| Normal weight (18.5-24.9 kg/m <sup>2</sup> ) | 3969 (53.3)     | 2696 (46.9)     |           |
| Overweight (25-29.9 kg/m <sup>2</sup> )      | 2137 (28.7)     | 1677 (29.2)     |           |
| Obese (30-35 kg/m <sup>2</sup> )             | 1217 (16.4)     | 1257 (21.9)     |           |
| <b>Physical activity</b>                     |                 |                 | <0.001    |
| High (≥ 1200 MET min/week)                   | 1278 (16.7)     | 949 (15.9)      |           |
| Moderate (600-1199 MET min/week)             | 2006 (26.3)     | 1456 (24.4)     |           |
| Low (40-599 MET min/week)                    | 2346 (30.7)     | 1814 (30.4)     |           |
| Nil/sedentary (0-39 MET min/week)            | 2010 (26.3)     | 1748 (29.3)     |           |

|                          |             |             |        |
|--------------------------|-------------|-------------|--------|
| <b>Alcohol intake</b>    |             |             | <0.001 |
| Low risk                 | 3912 (51.2) | 2620 (44.1) |        |
| Non/rarely               | 3357 (43.9) | 2978 (50.1) |        |
| Risky                    | 374 (4.9)   | 342 (5.8)   |        |
| <b>Smoking status</b>    |             |             | <0.001 |
| Never                    | 4122 (55.2) | 2927 (50.5) |        |
| Ex-smoker                | 2116 (28.3) | 1660 (28.6) |        |
| Current                  | 1233 (16.5) | 1210 (20.9) |        |
| <b>Menopausal status</b> |             |             | <0.001 |
| Surgical menopause       | 1554 (20.2) | 1656 (27.6) |        |
| Hormone use              | 1119 (15.6) | 888 (14.8)  |        |
| Pre-menopausal           | 2842 (37.0) | 1770 (29.5) |        |
| Peri-menopausal          | 1769 (23.0) | 1321 (22.0) |        |
| Post-menopausal          | 393 (5.1)   | 361 (6.0)   |        |

Data are presented as n (%) or mean  $\pm$  standard deviation. Column number may not equal n as a result of missing data.

\* Independent-samples *t*-test was used for continuous variable (age); chi-squared analyses were used for categorical variables.

Table S3. Percentage of women reporting multimorbidity in Surveys 2-8 by social relationship score at the previous surveys (n=7694)

| Score   | Survey (age range) |               |               |               |               |               |               |
|---------|--------------------|---------------|---------------|---------------|---------------|---------------|---------------|
|         | S2<br>(47-52)      | S3<br>(50-55) | S4<br>(53-58) | S5<br>(56-61) | S6<br>(59-64) | S7<br>(62-67) | S8<br>(65-70) |
| ≤5      | 33.5               | 47.8          | 59.2          | 67.4          | 71.6          | 79.7          | 84.4          |
| 6       | 25.8               | 33.7          | 46.7          | 58.9          | 63.6          | 70.9          | 79.4          |
| 7       | 24.1               | 33.7          | 40.7          | 50.6          | 68.0          | 69.9          | 75.9          |
| 8       | 16.1               | 25.4          | 40.4          | 51.2          | 57.3          | 66.7          | 77.7          |
| 9       | 12.0               | 21.8          | 34.4          | 48.7          | 54.8          | 62.6          | 71.5          |
| 10      | 10.2               | 21.1          | 31.7          | 42.3          | 48.5          | 55.7          | 61.5          |
| 11      | 11.0               | 17.0          | 27.4          | 40.8          | 49.1          | 57.9          | 63.1          |
| 12      | 7.1                | 17.6          | 24.4          | 37.4          | 46.4          | 53.9          | 63.1          |
| 13      | 8.7                | 14.4          | 25.5          | 34.0          | 47.6          | 53.1          | 63.9          |
| 14      | 5.8                | 16.8          | 26.7          | 36.6          | 41.9          | 51.0          | 58.7          |
| 15      | 4.7                | 19.7          | 25.0          | 33.2          | 46.2          | 54.8          | 57.7          |
| Average | 10.9               | 21.8          | 31.7          | 42.3          | 49.9          | 57.7          | 64.2          |

Table S4. Full results of associations (ORs and 95% CIs) between all variables and accumulation of multimorbidity (n=7694).

| Characteristics                    | OR (95% CI)       |
|------------------------------------|-------------------|
| <b>Age at baseline</b>             | 1.11 (1.09, 1.13) |
| <b>Period (survey wave)</b>        | 1.03 (1.01, 1.05) |
| <b>Overall satisfaction score</b>  |                   |
| ≤5                                 | 2.35 (1.94, 2.83) |
| 6                                  | 1.79 (1.45, 2.19) |
| 7                                  | 1.95 (1.63, 2.32) |
| 8                                  | 1.66 (1.42, 1.94) |
| 9                                  | 1.48 (1.28, 1.71) |
| 10                                 | 1.28 (1.12, 1.46) |
| 11                                 | 1.32 (1.14, 1.52) |
| 12                                 | 1.20 (1.03, 1.38) |
| 13                                 | 1.24 (1.07, 1.44) |
| 14                                 | 1.10 (0.94, 1.29) |
| 15                                 | Ref               |
| <b>Marital status</b>              |                   |
| Married/de facto                   | Ref               |
| Separated/divorced/widowed         | 1.04 (0.96, 1.13) |
| Never married                      | 1.02 (0.85, 1.23) |
| <b>Area of residence</b>           |                   |
| Major cities                       | Ref               |
| Inner regions                      | 1.03 (0.96, 1.10) |
| Outer regions                      | 0.93 (0.86, 1.02) |
| Remote/very remote                 | 0.76 (0.64, 0.89) |
| <b>Education</b>                   |                   |
| University/Higher degree           | Ref               |
| Trade/apprenticeship/diploma       | 1.10 (0.99, 1.22) |
| High school certificate            | 0.93 (0.83, 1.04) |
| No qualifications                  | 1.09 (0.99, 1.20) |
| <b>Country of birth</b>            |                   |
| Australia                          | Ref               |
| Outside Australia                  | 1.00 (0.93, 1.07) |
| <b>Ability to manage on income</b> |                   |
| Easy/not bad                       | Ref               |

|                                              |                   |
|----------------------------------------------|-------------------|
| Sometime difficult                           | 1.21 (1.13, 1.29) |
| Impossible/difficult always                  | 1.52 (1.39, 1.66) |
| <b>BMI categories</b>                        |                   |
| Underweight (< 18.5 kg/m <sup>2</sup> )      | 1.34 (1.02, 1.77) |
| Normal weight (18.5-24.9 kg/m <sup>2</sup> ) | Ref               |
| Overweight (25-29.9 kg/m <sup>2</sup> )      | 1.33 (1.24, 1.43) |
| Obese (30-35 kg/m <sup>2</sup> )             | 1.76 (1.63, 1.90) |
| <b>Physical activity</b>                     |                   |
| High (≥ 1200 MET min/week)                   | Ref               |
| Moderate (600-1199 MET min/week)             | 1.04 (0.96, 1.12) |
| Low (40-599 MET min/week)                    | 1.12 (1.04, 1.20) |
| Nil/sedentary (0-39 MET min/week)            | 1.20 (1.10, 1.31) |
| <b>Alcohol intake</b>                        |                   |
| Low risk                                     | Ref               |
| Non/rarely                                   | 1.06 (0.99, 1.13) |
| Risky                                        | 1.09 (0.97, 1.23) |
| <b>Smoking status</b>                        |                   |
| Never                                        | Ref               |
| Ex-smoker                                    | 1.10 (1.03, 1.18) |
| Current                                      | 1.31 (1.19, 1.44) |
| <b>Menopausal status</b>                     |                   |
| Surgical menopause                           | 1.33 (1.24, 1.43) |
| Hormone use                                  | 1.29 (1.16, 1.44) |
| Oral contraceptive use                       | 0.93 (0.74, 1.17) |
| Pre-menopausal                               | 0.65 (0.57, 0.74) |
| Peri-menopausal                              | 0.88 (0.79, 0.99) |
| Post-menopausal                              | Ref               |

Table S5. Roles of each social relationship component (column) in attenuating the associations between other social relationship component (row) and accumulation of multimorbidity (n=7694).

|                        | Partner/<br>closest person | Family<br>members | Friends | Work/career/<br>study | Social<br>activities | All    |
|------------------------|----------------------------|-------------------|---------|-----------------------|----------------------|--------|
| Partner/closest person | -                          | 39.12             | 20.44   | 16.08                 | 38.49                | 64.98  |
| Family members         | 23.70                      | -                 | 22.76   | 15.63                 | 35.34                | 48.54  |
| Friends                | 37.36                      | 40.34             | -       | 20.93                 | 79.46                | 122.22 |
| Work/career/study      | 20.17                      | 27.87             | 23.22   | -                     | 39.13                | 53.58  |
| Social activities      | 17.89                      | 22.72             | 8.18    | 13.41                 | -                    | 27.52  |

Percentage of attenuation:  $100 \times (\beta_{\text{Model index component}} - \beta_{\text{Model index component} + \text{other component(s)}}) / (\beta_{\text{Model index component}})$ . For example, 39.12% in Column 2 and Row 1 indicates that there is 39.12% attenuation when adding satisfaction with family member to the model of satisfaction with partner/closest person. 64.98% in Column 6 and Row 1 indicates that the other four social relationship components combined explained 64.98% of the association between satisfaction with partner/closest person and accumulation of multimorbidity.

Table S6. Associations (ORs and 95% CIs) of overall social relationships satisfaction score at baseline with accumulation of multimorbidity (n=7357).

| Satisfaction score | Accumulation of multimorbidity |
|--------------------|--------------------------------|
| ≤5                 | 2.22 (1.79, 2.75)              |
| 6                  | 2.10 (1.68, 2.61)              |
| 7                  | 1.91 (1.58, 2.31)              |
| 8                  | 1.67 (1.42, 1.97)              |
| 9                  | 1.48 (1.27, 1.72)              |
| 10                 | 1.36 (1.19, 1.56)              |
| 11                 | 1.44 (1.24, 1.66)              |
| 12                 | 1.27 (1.10, 1.46)              |
| 13                 | 1.39 (1.20, 1.62)              |
| 14                 | 1.09 (0.93, 1.28)              |
| 15                 | Ref                            |

Table S7. Associations (ORs and 95% CIs) of overall social relationships satisfaction score with accumulation of multimorbidity in complete cases (n=4521).

| Satisfaction score | Accumulation of multimorbidity |
|--------------------|--------------------------------|
| ≤5                 | 2.34 (1.86, 2.94)              |
| 6                  | 1.80 (1.41, 2.30)              |
| 7                  | 1.98 (1.61, 2.44)              |
| 8                  | 1.67 (1.39, 2.01)              |
| 9                  | 1.53 (1.29, 1.82)              |
| 10                 | 1.29 (1.10, 1.51)              |
| 11                 | 1.36 (1.15, 1.61)              |
| 12                 | 1.25 (1.06, 1.48)              |
| 13                 | 1.28 (1.08, 1.52)              |
| 14                 | 1.14 (0.95, 1.36)              |
| 15                 | Ref                            |

Table S8. Associations (ORs and 95% CIs) of overall social relationships satisfaction score with incidence of one condition and accumulation of multimorbidity (n=7357).

| satisfaction score | Number of new condition(s) |                   |
|--------------------|----------------------------|-------------------|
|                    | 1                          | ≥ 2               |
| ≤5                 | 1.38 (1.08, 1.77)          | 2.40 (1.98, 2.90) |
| 6                  | 1.36 (1.05, 1.76)          | 1.83 (1.49, 2.26) |
| 7                  | 1.20 (0.96, 1.50)          | 1.98 (1.66, 2.37) |
| 8                  | 1.12 (0.92, 1.35)          | 1.66 (1.41, 1.94) |
| 9                  | 1.22 (1.03, 1.45)          | 1.48 (1.28, 1.72) |
| 10                 | 1.23 (1.05, 1.44)          | 1.29 (1.12, 1.47) |
| 11                 | 1.18 (1.00, 1.40)          | 1.32 (1.14, 1.53) |
| 12                 | 1.27 (1.08, 1.50)          | 1.20 (1.04, 1.39) |
| 13                 | 1.20 (1.01, 1.43)          | 1.24 (1.07, 1.44) |
| 14                 | 1.20 (1.00, 1.43)          | 1.11 (0.94, 1.30) |
| 15                 | Ref                        | Ref               |

The model was estimated using cumulative incidence of multimorbidity (1 or ≥2) at each survey regressed on covariate variables at the previous survey, compared with women who developed 0 new conditions. The models were all adjusted for age at baseline, marital status, area of residence, education, country of birth, ability to manage on income, physical activity, alcohol intake, smoking status, and menopausal status.
